# Supplementary material for: College Students’ Views of Work–Life Balance in STEM Research Careers: Addressing Negative Preconceptions
Source: Atypon-hosted journal article supplement (doi:10.1187/cbe.14-11-0210), 2015-07-03
Supplement: combinedsupmats.pdf [file combinedsupmats.pdf]

# Supplemental Material

*CBE—Life Sciences Education*

Tan-Wilson *et al.*

Supplementary Table 1. Comparison of work-life balance survey responses of four cohorts

| Supplementary Table 1. Comparison of work-life balance survey responses of four cohorts                                                                                                                                                                                                               |                         |        |        |        |                        |        |        |        |
|-------------------------------------------------------------------------------------------------------------------------------------------------------------------------------------------------------------------------------------------------------------------------------------------------------|-------------------------|--------|--------|--------|------------------------|--------|--------|--------|
| Number of participants in each cohort                                                                                                                                                                                                                                                                 |                         |        |        |        |                        |        |        |        |
| Cohort                                                                                                                                                                                                                                                                                                | I                       | II     | III    | IV     |                        |        |        |        |
| Men                                                                                                                                                                                                                                                                                                   | 11                      | 9      | 20     | 12     |                        |        |        |        |
| Women                                                                                                                                                                                                                                                                                                 | 8                       | 15     | 14     | 13     |                        |        |        |        |
| Q1 Will I still be able to meet my future spouse/partner?<br>Q2 Will my spouse/partner and I be able to find jobs in the same location?<br>Q3 Will my career be set back as I take time for maternity/paternity leave?<br>Q4 As I work at my career, will I have time to spend with my child/children |                         |        |        |        |                        |        |        |        |
|                                                                                                                                                                                                                                                                                                       | Before panel discussion |        |        |        | After panel discussion |        |        |        |
|                                                                                                                                                                                                                                                                                                       | Q1                      | Q2     | Q3     | Q4     | Q1                     | Q2     | Q3     | Q4     |
| Men                                                                                                                                                                                                                                                                                                   |                         |        |        |        |                        |        |        |        |
| H <sup>a</sup>                                                                                                                                                                                                                                                                                        | 0.7820                  | 2.5900 | 1.3970 | 1.7050 | 1.9620                 | 3.4740 | 4.1920 | 3.9360 |
| P <sup>b</sup>                                                                                                                                                                                                                                                                                        | >0.05                   | >0.05  | >0.05  | >0.05  | >0.05                  | >0.05  | >0.05  | >0.05  |
| Women                                                                                                                                                                                                                                                                                                 |                         |        |        |        |                        |        |        |        |
| H                                                                                                                                                                                                                                                                                                     | 2.1280                  | 1.2440 | 0.7560 | 1.7300 | 0.5771                 | 3.1030 | 2.2690 | 2.0130 |
| P                                                                                                                                                                                                                                                                                                     | >0.05                   | >0.05  | >0.05  | >0.05  | >0.05                  | >0.05  | >0.05  | >0.05  |
| <sup>a</sup> H statistic from the Kruskal-Wallis test (3 degrees of freedom)<br><sup>b</sup> Medians among cohorts are not significantly different when H < 7                                                                                                                                         |                         |        |        |        |                        |        |        |        |
